# Supplementary material
Source: ML conference proceedings conference paper supplement (https://www.ecva.net/papers/eccv_2020/papers_ECCV/html/123660137_ECCV_2020_paper.php)
Supplement: Supplementary file 1 [file 123660137-supp.zip]

# Disambiguating Monocular Depth Estimation with a Single Transient: Supplemental Information

Mark Nishimura, David B. Lindell, Christopher A. Metzler, and  
Gordon Wetzstein

Stanford University, Stanford, CA  
{markn1, lindell, cmetzler, gordon.wetzstein}@stanford.edu

## 1 Hardware prototype details

The monocular depth estimate is calculated using the RGB image captured by the Kinect v2. The SPAD records temporal histograms with 4096 bins, each corresponding to a time window of 16 ps. The SPAD and laser are co-axially aligned using a beam splitter (Thorlabs PBS251). The full width at half maximum (FWHM) of the combined laser pulse width and SPAD jitter is about 70 ps, allowing the system to record depth maps with an accuracy of about 1 cm. A National Instruments data acquisition device (NI-DAQ USB-6343) provides synchronization signals for the galvos, SPAD, and laser. The ground truth depth map is raster-scanned at a resolution of  $512 \times 512$  pixels, and the single-pixel, diffused SPAD measurement is generated by summing all of these measurements for a specific scene. This allows us to validate the accuracy of the proposed histogram matching algorithm, which only uses the integrated single histogram, by comparing it with the captured depth—such validation would not be possible if we were to capture measurements with an optically diffused SPAD.

## 2 Comparison of diffused vs. scanned imaging

In our experiments, we capture measurements by scanning the scene with a single-pixel SPAD detector whose optical path is aligned with a laser. This arrangement allows us to capture a reference “ground truth” depth map for quantitative validation of our method. To emulate measurements captured using a system where the laser and detector are diffused over the scene, we digitally sum the measurements to obtain a single transient.

In order to verify that digital summation of scanned measurements yields results that are similar to those captured by a diffused laser and detector, we capture an example scene using a modified hardware prototype in both scanned and diffused modes. This hardware prototype (shown in Fig. 1) is less mobile than our unmodified prototype (which was able capture a wider variety of scenes, including outdoors, along with their ground truth depths), but allows us to use a more powerful laser (Katana 05HP, 532 nm) operated at approximately 25 mW

average power. We also use two single-pixel SPAD detectors, where one SPAD is aligned with the optical path of the laser, and the other SPAD is operated without a lens to integrate light from the entire scene. Both SPADs are fitted with a 10 nm bandpass filter centered at 532 nm, which reduces the amount of integrated ambient light. We attach a holographic diffuser (Thorlabs ED1-S50) to the laser output in order to diffuse light onto the scene. Alternatively, we remove the diffuser and use a pair of scanning mirrors to scan the scene.

The modified hardware setup is used to capture an example scene in both scanned and diffused modes, and the resulting transients are used to refine an initial depth estimate from the Kinect RGB image. We illustrate the results of this procedure in Fig. 2. The reconstructions from the scanned and diffused measurements are similar in reconstruction quality and also show similar quantitative improvement in terms of error over the initial depth estimate. The unnormalized photon counts are also shown in Fig. 2, and we note that the counts show similar trends. The number of recorded photons in these experiments is shown in Table 1. In both cases, the rate of detected photons is far less ( $<5\%$ ) than the number of emitted laser pulses, and so we conclude that the measurements are captured in the low-flux regime where pileup effects are negligible. We attribute most of the differences between the scanned and diffused transients to the approximately 16 cm vertical baseline between the positions of the diffused and scanned SPADs (see Fig. 1).

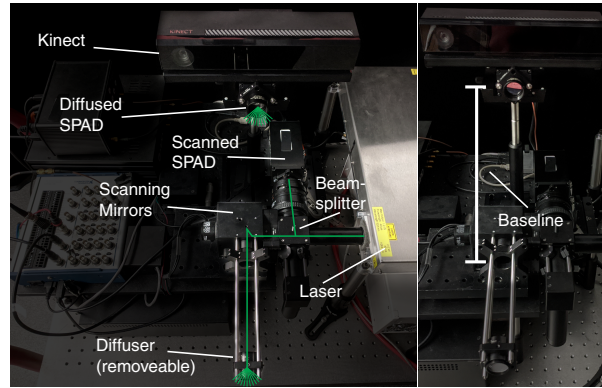

Fig. 1: Modified hardware setup. The setup is used to compare scanned and diffused measurements and employs two SPAD detectors and two laser configurations. In the first configuration, the scene is illuminated by sending the laser light through a holographic diffuser and a lensless SPAD integrates light from the entire scene. In the second, the SPAD is aligned with the optical path of the laser and the scene is scanned using a pair of scanning mirrors. The baseline between the two SPADs (right) results in some observed differences in the recorded transients.

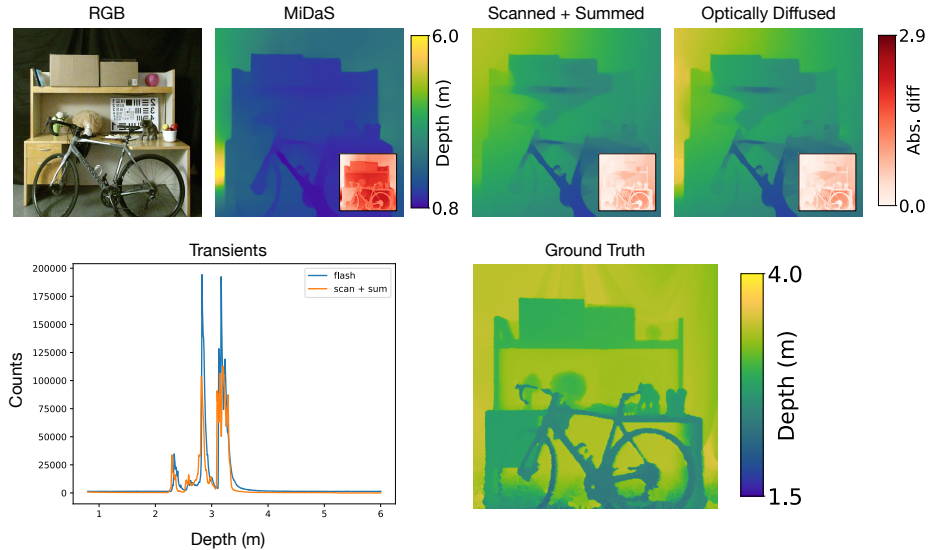

Fig. 2: Comparison of scan + sum and diffused SPAD. The transients are captured with the same total exposure time and are qualitatively similar without noticeable pileup effects. We use  $K = 300$  bins for the reconstruction and a depth range of  $[0.8, 6]$  meters. MiDaS [3] does not produce globally-scaled depth, so we scale it to fit this depth range. We inpaint the depth map from the Kinect’s depth camera to acquire ground truth depth.

| Experiment | Detected Photons  | Laser Pulses    | Detection Rate |
|------------|-------------------|-----------------|----------------|
| Scanned    | $1.4 \times 10^7$ | $6 \times 10^8$ | 2.3%           |
| Diffused   | $2.4 \times 10^7$ | $6 \times 10^8$ | 4.0%           |

Table 1: **Recorded photons for diffused vs. scanned scene.** In each capture mode, scanned or diffused, the number of detected photons does not exceed 5% of the number of emitted laser pulses, placing the capture within the low-flux regime where pileup effects are negligible.

### 3 Radiometric calculation

Assuming an indoor scene with fluorescent bulbs and an ambient spectral irradiance of  $I_A = 1 \text{ mW/m}^2$  (across the 1 nm pass band of a spectral filter matched to the laser), we find that the laser power required to achieve a minimum SBR of 5 for a diffuse scene at  $R = 3 \text{ m}$  and a field of view of  $\theta = 40^\circ$  can be calculated as

$$P_{\min} = I_A \cdot 4R^2 \tan^2(\theta/2) \cdot SBR_{\min}, \quad (1)$$

giving  $P_{\min} = 21$  mW. We note that this is significantly less than the 60 mW used by the Kinect sensor to diffusely illuminate a scene.

Under these scene parameters, we can compute the total incident flux on the detector per second (derived in [4]) as

$$P_R = P_T \cdot \rho \cdot \frac{A_{rec}}{\pi R^2} \cdot \eta \quad (2)$$

where  $P_T$  is the illumination power in the visible region,  $\rho$  is its albedo,  $A_{rec}$  is the area of the detector region,  $R$  is the distance to the object, and  $\eta$  is the quantum efficiency of the detector.

For scene itself, we assume a vertical, planar, perfectly Lambertian surface. The following table gives the values used for this calculation.

| Symbol    | Description                                        | Nominal Value          |
|-----------|----------------------------------------------------|------------------------|
| $\rho$    | Albedo of lambertian surface                       | 0.3                    |
| $P_T$     | Total irradiance at wavelength (W/m <sup>2</sup> ) | 0.026                  |
| $R$       | Distance to surface (m)                            | 3                      |
| $A_{rec}$ | Area of detector (m <sup>2</sup> )                 | $1.96 \times 10^{-9}$  |
| $\eta$    | Quantum efficiency of detector                     | 0.3                    |
| $P_R$     | Received power at detector (W)                     | $1.62 \times 10^{-13}$ |

Fig. 3: Table of nominal values for radiometric calculation.

Once  $P_R$  is determined, we compute the number of photons using the laser wavelength  $\lambda = 532$  nm as

$$N = \frac{P_R \lambda}{hc} \quad (3)$$

where  $h \approx 6.626 \times 10^{-34}$  J · s is Planck’s constant and  $c \approx 3 \times 10^8$  m/s is the speed of light. Using the fact that our laser runs at 10 MHz, we get the number of photons per pulse as 0.043 or 4.3%, which puts us in the low-flux regime (where photons per pulse is < 5%) [5].

## 4 Ablation study on number of SID bins

We conducted an ablation study on the effect of the number of SID bins [2] on both runtime and RMSE. We performed this analysis using SPAD data with a signal-to-background (SBR) of 100, simulated on the test set of NYU Depth v2. We used DenseDepth [1] for our MDE CNN. Only the histogram matching portion was timed, not the CNN nor the denoising pipeline.



| # of sid bins | RMSE  | Approx. Time/image (sec) |
|---------------|-------|--------------------------|
| 70            | 0.351 | 0.24                     |
| 140           | 0.346 | 0.63                     |
| 210           | 0.345 | 1.12                     |
| 280           | 0.345 | 1.84                     |

Fig. 4: Effect of number of SID bins on RMSE and runtime. The marginal improvement in RMSE is offset by the increase in runtime as the number of bins grows.

## 5 Ablation study on effect of reflectance estimation

We conducted an ablation study on whether the use of a reflectance estimate has an impact on the runtime and quality of the solution. We performed this analysis using SPAD data with a signal-to-background (SBR) of 100, simulated on the test set of NYU Depth v2 and using DenseDepth [1] for our MDE CNN. Only the histogram matching portion was timed, not the CNN nor the denoising pipeline. Using the intensity to produce the initial weighted histogram  $h_{\text{source}}$  provides noticable improvements in RMSE, but intensity may safely be ignored during the pixel movement step, resulting in noticeable speed improvements.

| Intensity-weighted histogram | Intensity-aware pixel movement | Avg. RMSE | Time per image (sec) |
|------------------------------|--------------------------------|-----------|----------------------|
| Yes                          | Yes                            | 0.346     | 4.6                  |
|                              | No                             | 0.346     | 0.6                  |
| No                           | Yes                            | 0.444     | 4.7                  |
|                              | No                             | 0.444     | 0.6                  |

Fig. 5: Effect of reflectance modeling on RMSE and runtime. When the SPAD is simulated with the reflectance info but no reflectance estimate is used to generate a weighted histogram from the CNN depth map, the results are significantly worse. Furthermore, once the pixel movement matrix has been computed, the pixel movement procedure need not take into account the weights of the pixels being moved, since doing so provides no improvement and can take appreciably longer than a vectorized implementation that does not take pixel weights into account.

## 6 Pseudocode, pixel shifting, and dither artifacts

We give pseudocode for our algorithm here. In the first part of our algorithm we compute the pixel shifting matrix mapping the histogram  $h_s$  (computed from the

initial depth map and reflectance estimate) to  $h_t$  (computed from the captured transient).

---

**Algorithm 1** Find Pixel Movement

---

```

procedure FINDPIXELMOVEMENT( $h_s$  of length  $M$ ,  $h_t$  of length  $N$ )
  Initialize  $T$  as an  $M \times N$  array of zeros.
  for  $m$  in  $1, \dots, M$  do
    for  $n$  in  $1, \dots, N$  do
       $p_s \leftarrow \sum_{i=1}^{n-1} T[m, i]$ 
       $p_t \leftarrow \sum_{i=1}^{m-1} T[i, n]$ 
       $T[m, n] \leftarrow \min(h_s[m] - p_s, h_t[n] - p_t)$ 
    end for
  end for
  return  $T$ 
end procedure

```

---

Given this pixel movement matrix  $T$ , we apply the appropriate movements to the initial depth map  $I$ . The pixels of the image  $I$  take depth bin values in  $\{0, \dots, K-1\}$ .

---

**Algorithm 2** Move Pixels

---

```

procedure MOVEPIXELS(input image  $I$  size  $M \times N$ , pixel movement matrix  $T$  of
size  $K \times K$ )
  for  $k$  in  $0, \dots, K-1$  do
     $p[k, :] \leftarrow T[k, :] / \sum_{i=1}^K T[k, i]$ 
  end for
  for  $m$  in  $1, \dots, M$  do
    for  $n$  in  $1, \dots, N$  do
      Sample  $k'$  according to  $p[I[m, n], :]$ .
       $I[m, n] \leftarrow k'$ .
    end for
  end for
  return  $I$ 
end procedure

```

---

Because the pixel shifting process in Algorithm 2 contains a sampling step, it is possible for *dither artifacts* to appear in the output image  $I$ , as shown in figure 6. Specifically, when there are multiple possible output depth bins for a given input depth bin, and a large region of equal depth in the input image, the randomness in the pixel shifting algorithm will distribute the pixels of large, equal-depth region in the input across the multiple possible output depth bins in a random fashion.

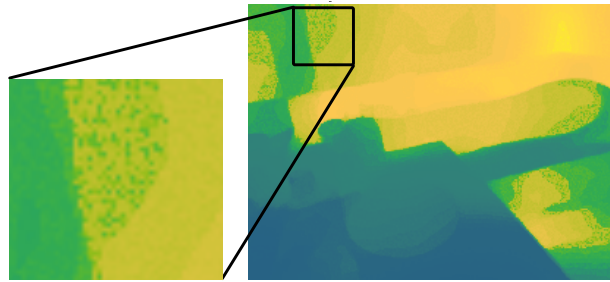

Fig. 6: Example of dither artifacts. Sometimes, when our histogram matching is applied to images with large regions of similar depths, dither artifacts will occur.

## 7 Additional results on NYU Depth v2

Figures 7–15 show additional results for our method on the NYU Depth v2 dataset when the depth estimate is initialized with the DenseDepth [1] (Figures 7–9), DORN [2] (Figures 10–12) and MiDaS [3] (Figures 13 – 15) monocular depth estimators.

We compare the output of the network  $z_0$ , the median-rescaled network output (where the depth map  $z_0$  is scaled pixel-wise by a scalar  $\frac{\text{median}(z_{GT})}{\text{median}(z_0)}$ ,  $z_{GT}$  being the ground truth depth map), the network output matched to the ground truth depth histogram, and the output of our histogram matching method under a signal-to-background ratio (SBR) of 100. We use the luminance of the RGB image as our reflectance map for both SPAD simulation and histogram matching. We show absolute difference maps and also give the root-mean-square error (RMSE) for each example.

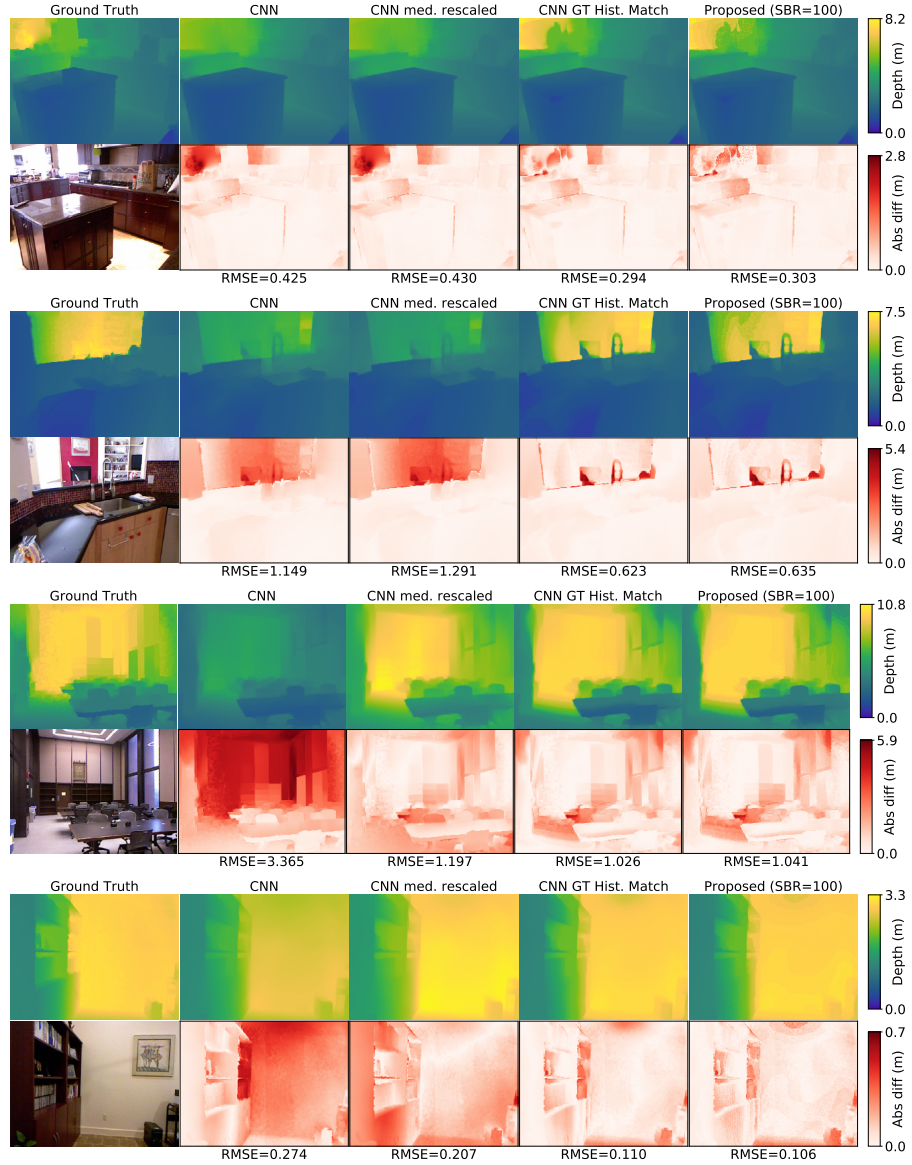

Fig. 7: Results with DenseDepth as the monocular depth estimator. Our method is able to scale and shift the depth maps to mitigate gross errors in depth scaling.

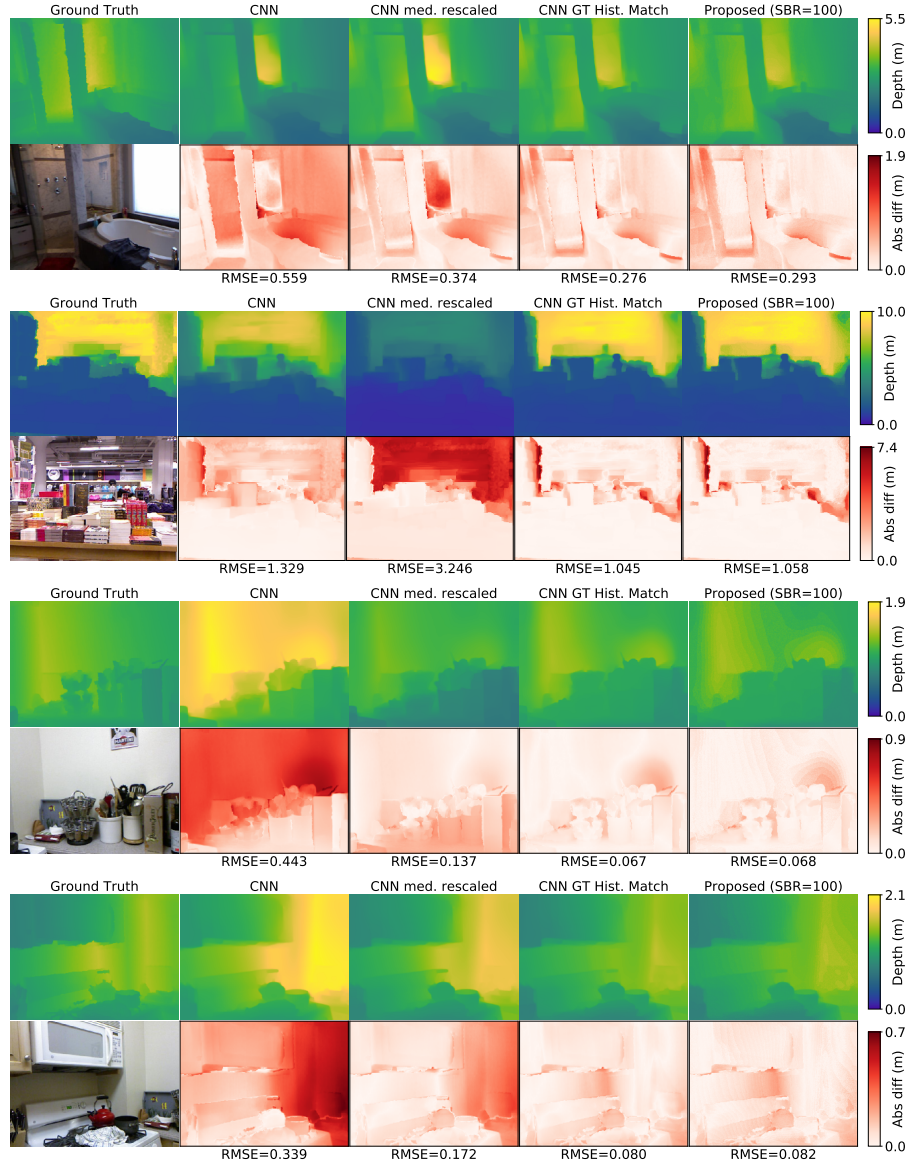

Fig. 8: Results with DenseDepth as the monocular depth estimator. Our method is able to scale and shift the depth maps to mitigate gross errors in depth scaling.

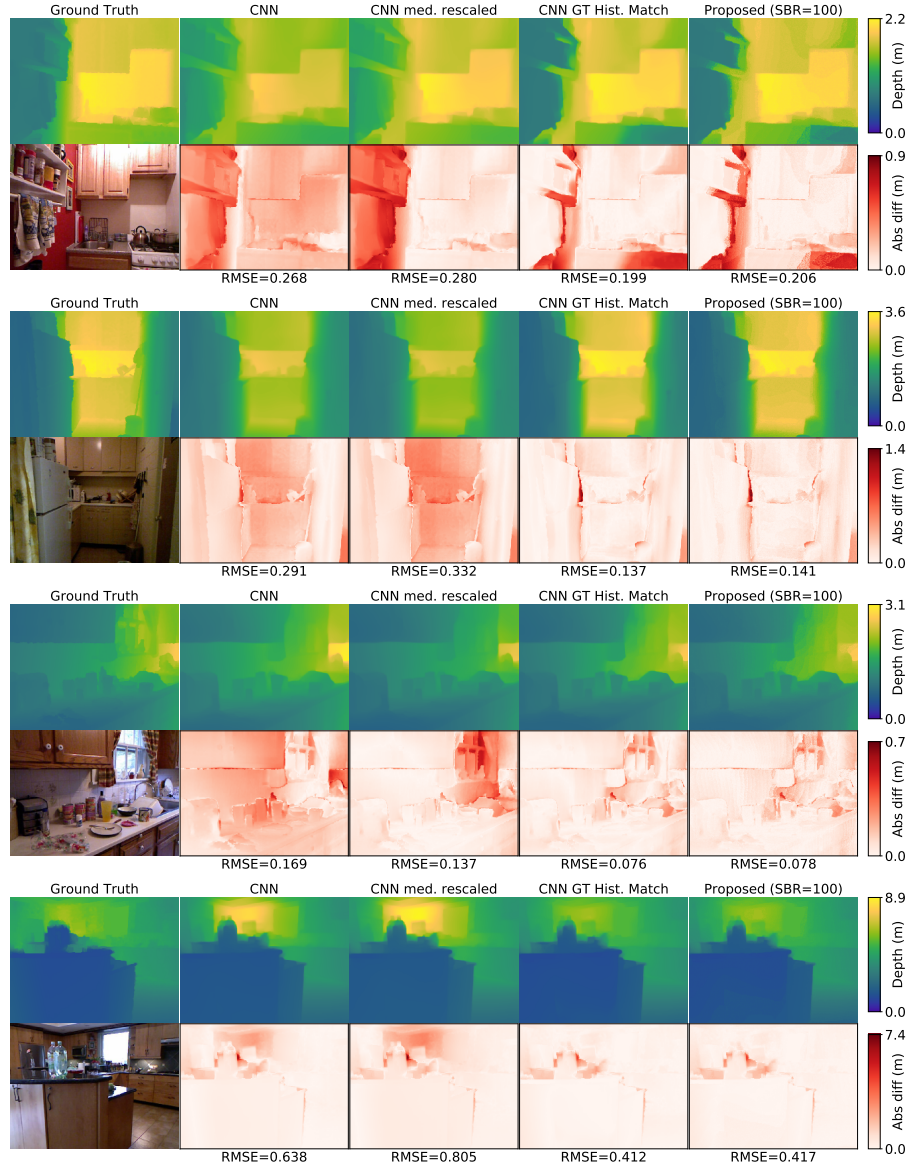

Fig. 9: Results with DenseDepth as the monocular depth estimator. Our method is able to scale and shift the depth maps to mitigate gross errors in depth scaling.



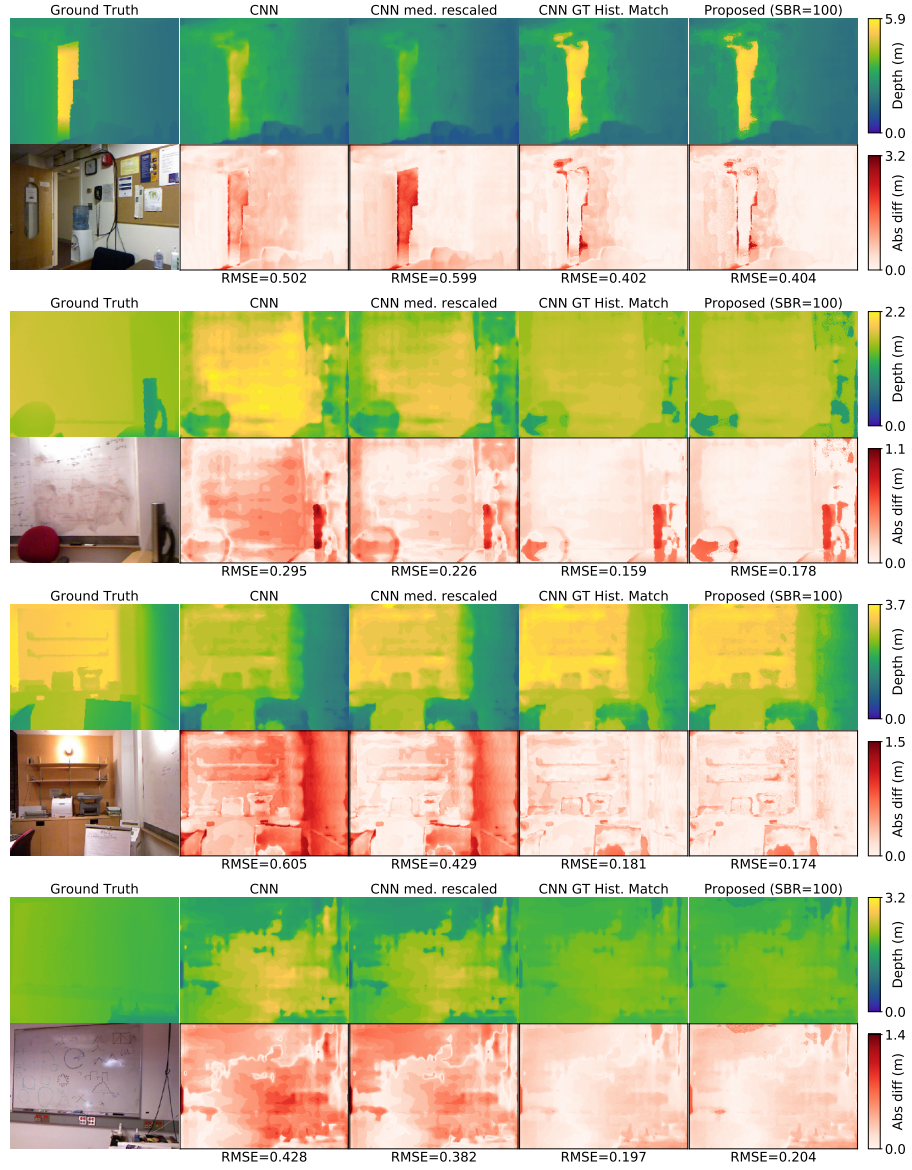

Fig. 10: Results with DORN as the monocular depth estimator. Our method is able to scale and shift the depth maps to mitigate gross errors in depth scaling.



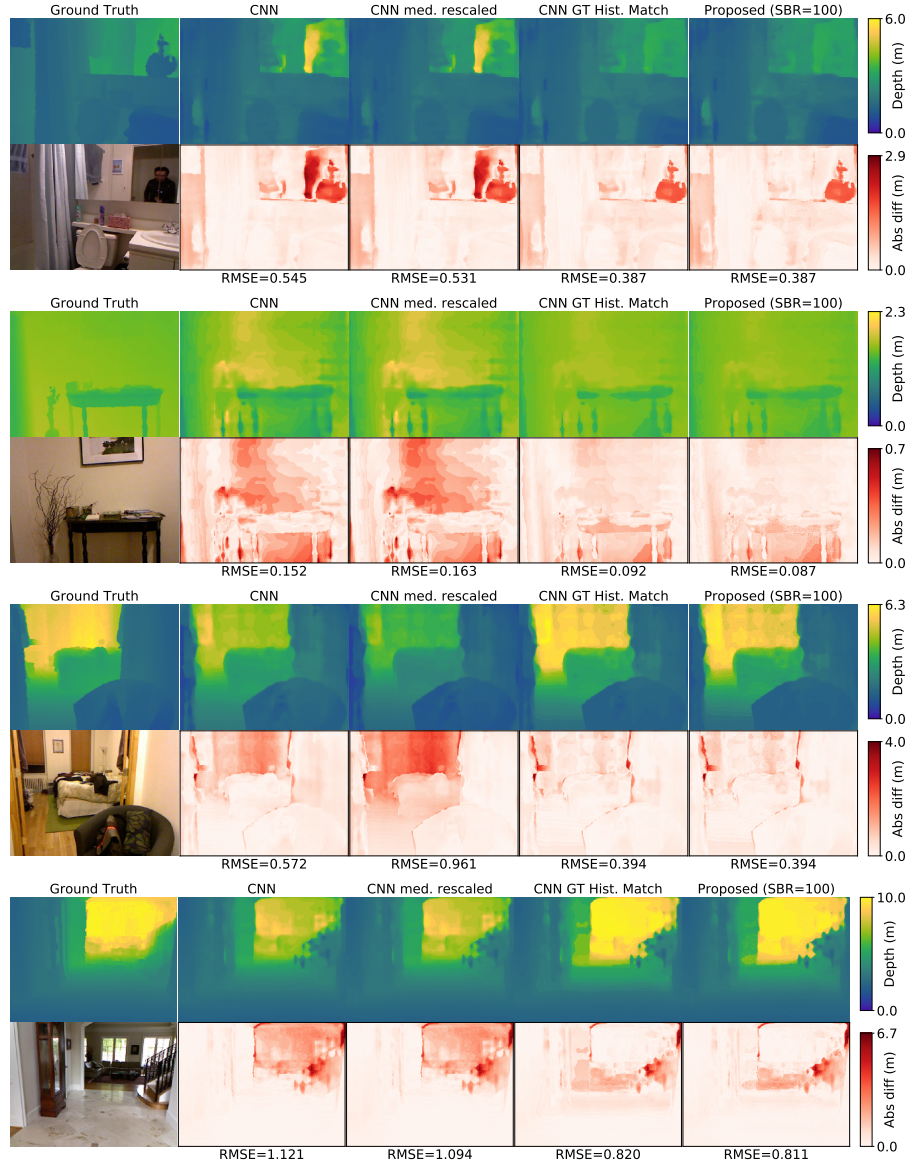

Fig. 11: Results with DORN as the monocular depth estimator. Our method is able to scale and shift the depth maps to mitigate gross errors in depth scaling.

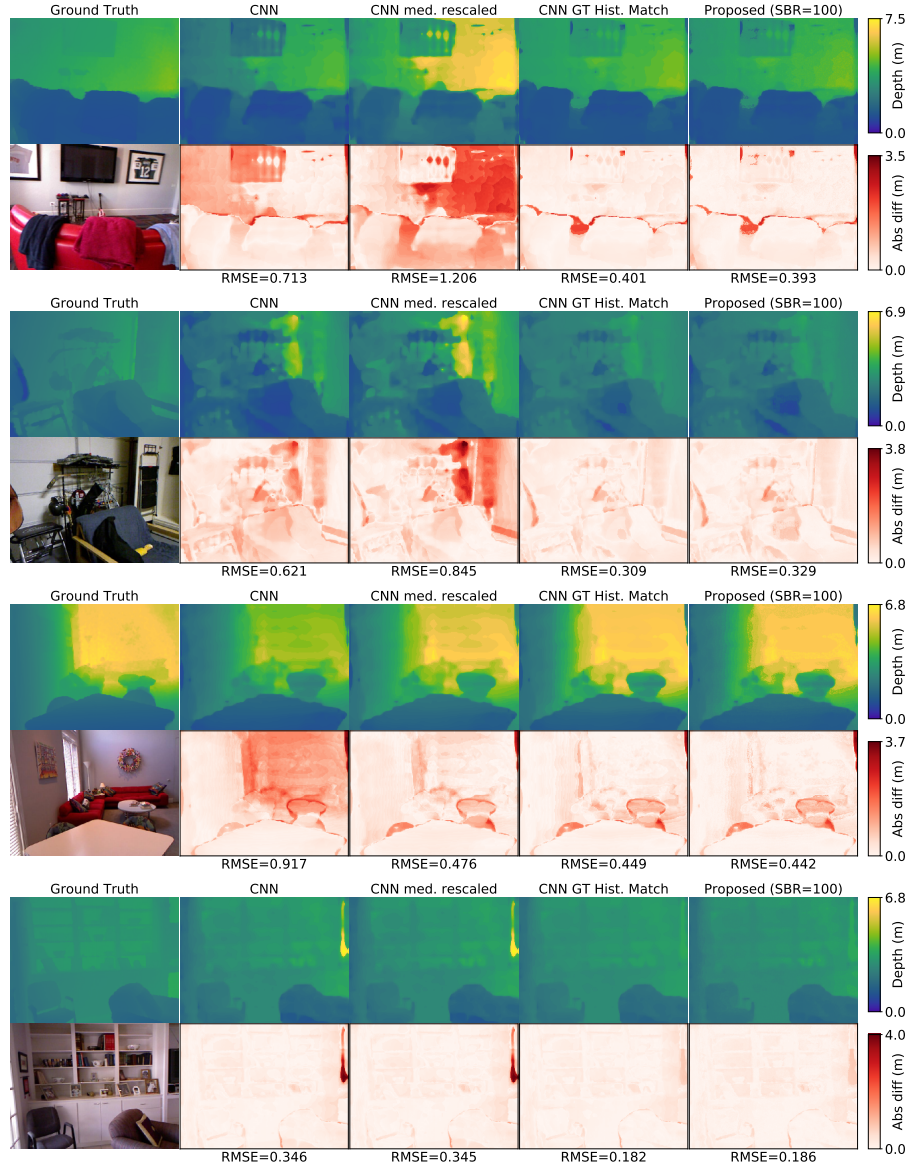

Fig. 12: Results with DORN as the monocular depth estimator. Our method is able to scale and shift the depth maps to mitigate gross errors in depth scaling.

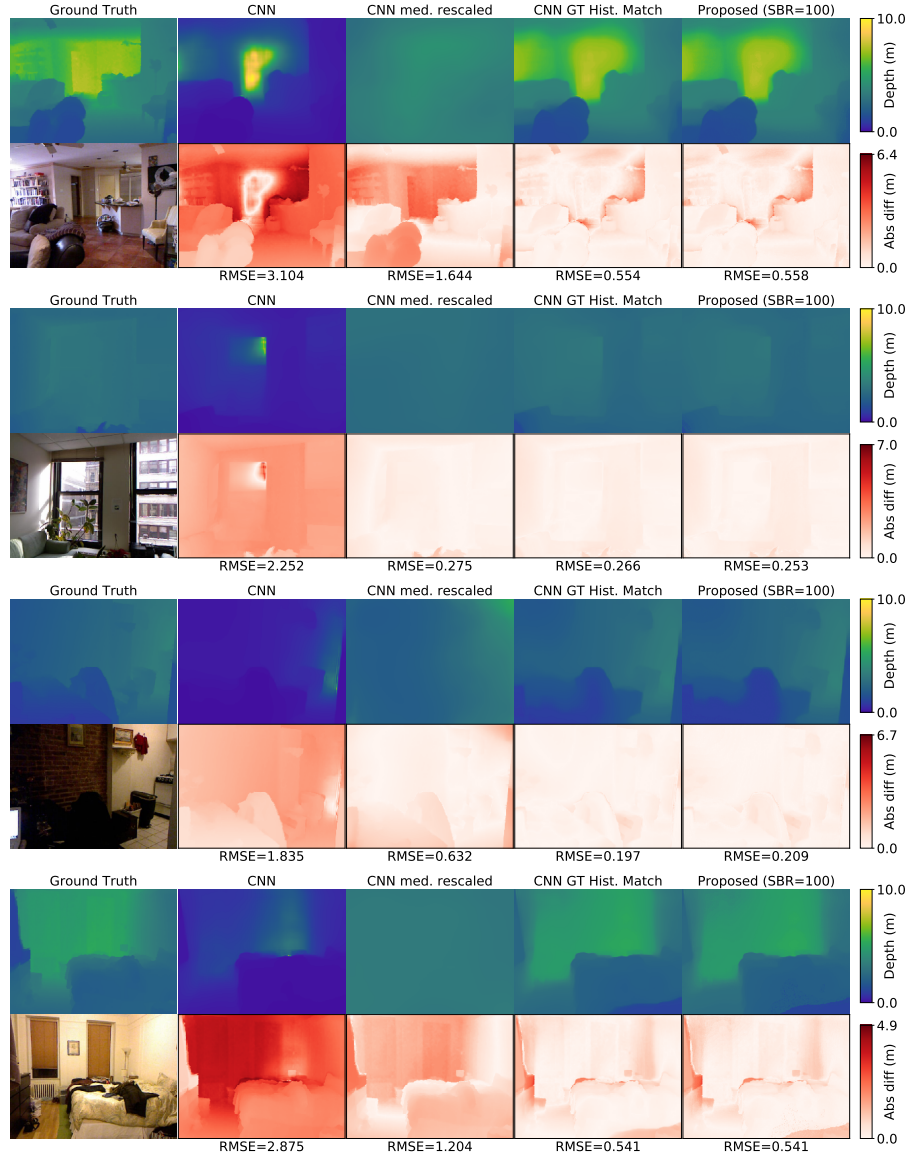

Fig. 13: Results with MiDaS as the monocular depth estimator. Our method is able to scale and shift the depth maps to mitigate gross errors in depth scaling.

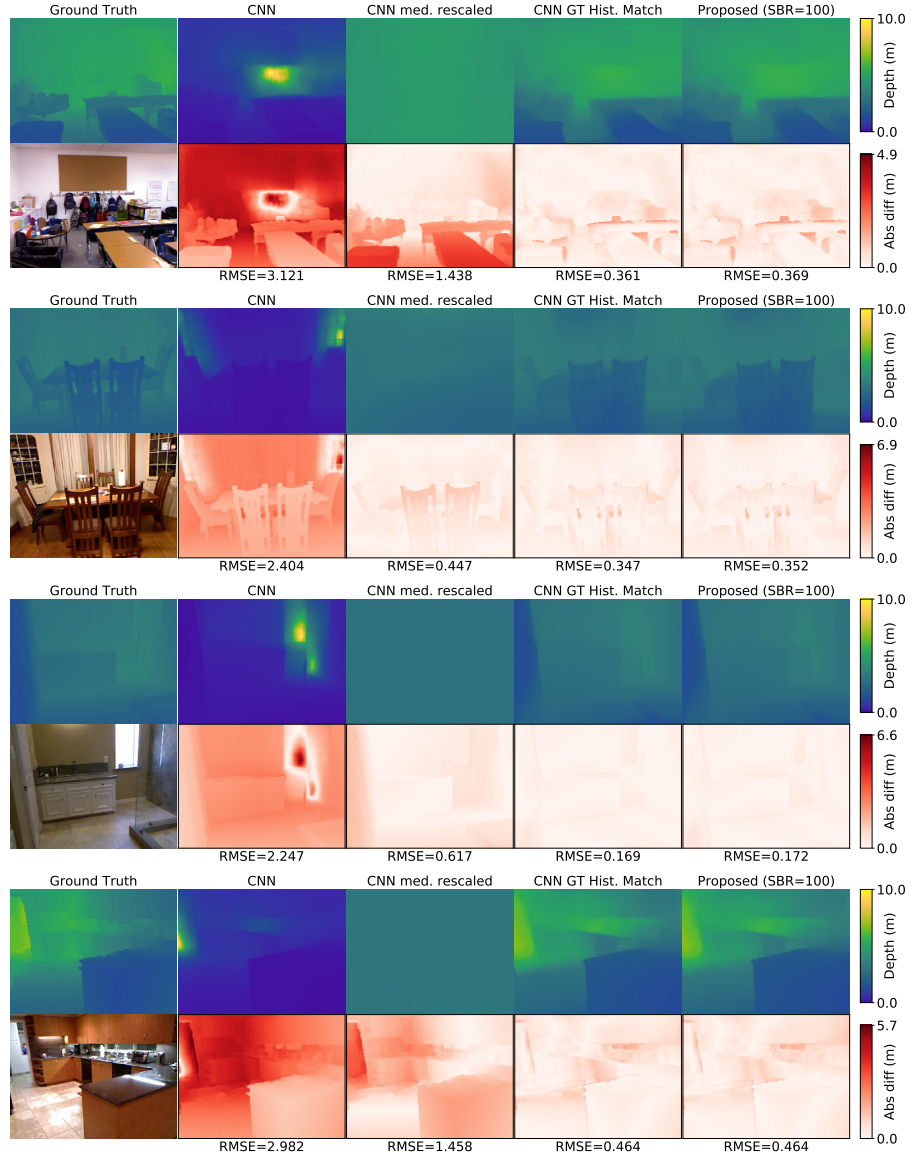

Fig. 14: Results with MiDaS as the monocular depth estimator. Our method is able to scale and shift the depth maps to mitigate gross errors in depth scaling.



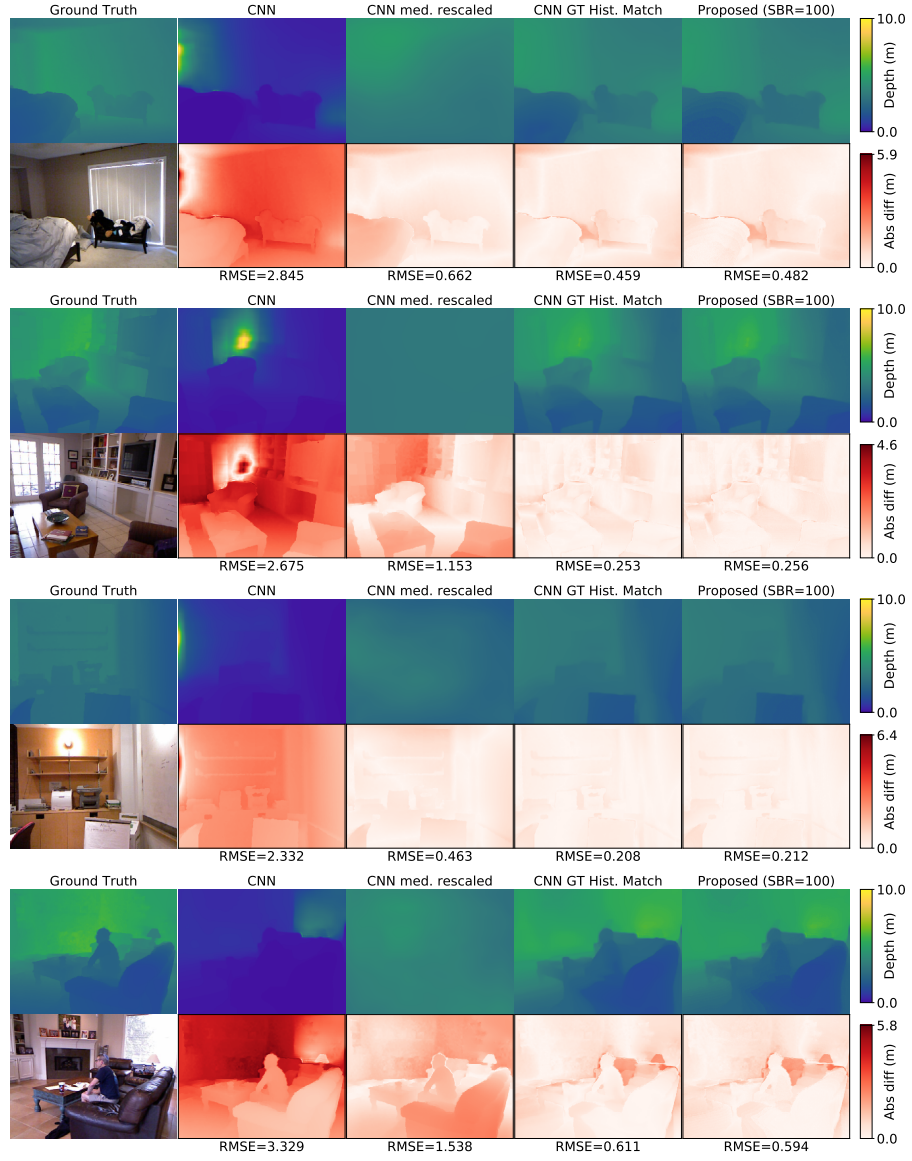

Fig. 15: Results with MiDaS as the monocular depth estimator. Our method is able to scale and shift the depth maps to mitigate gross errors in depth scaling.

## 8 Additional results for hardware prototype

Figures 16–24 show all the captured results when the depth estimate is initialized with the MiDaS [3] (Figures 16–18), DenseDepth (Figures 19–21), and DORN (Figures 22–24). We compare the output of the network  $z_0$ , the mean-rescaled network output where the depth map  $z_0$  has been scaled pixel-wise by the scalar  $\frac{\text{median}(h_{target})}{\text{median}(z_0)}$  ( $h_{target}$  is the processed SPAD transient), and the output of our method. As our laser is red, we use the R channel of the RGB image as our reflectance map. We show absolute difference maps and also give the root-mean-square-error (RMSE) for each example.

Black pixels in the ground truth depth correspond to locations where our scanner was unable to produce an accurate depth estimate (this can occur for a variety of reasons including dark albedo and surface specularity). These pixels are masked off and not used in the RMSE calculation, and appear as an absolute difference of 0 in the difference maps.

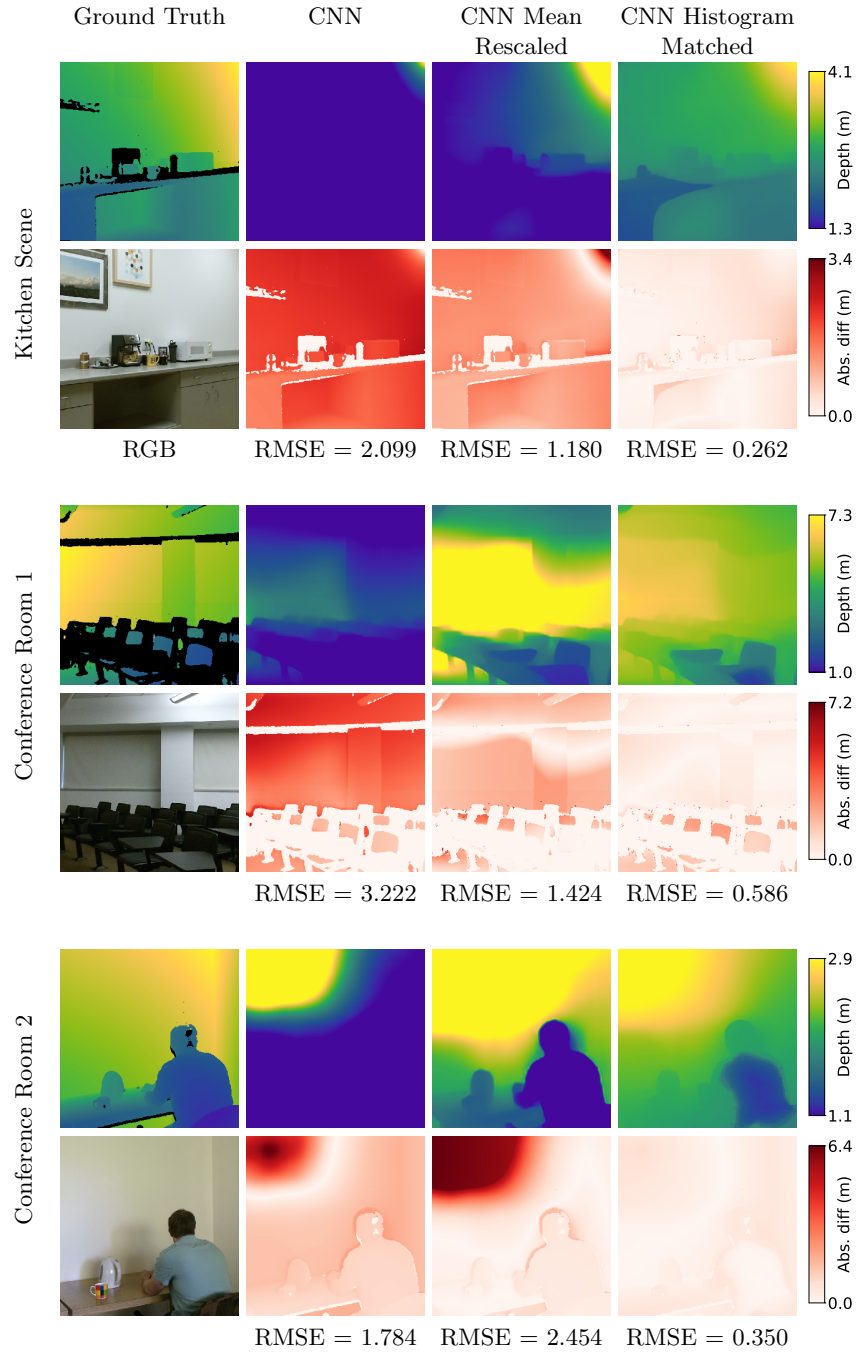

Fig. 16: Captured results initialized using the MiDaS CNN. Second row shows absolute difference between above estimates and ground truth. MiDaS does not output metric depth, so the CNN depth maps are scaled to be in the range (0.494, 9.094) by default. However, MiDaS does produce accurate ordinal depth, leading to stronger performance of our histogram matching compared to other methods.

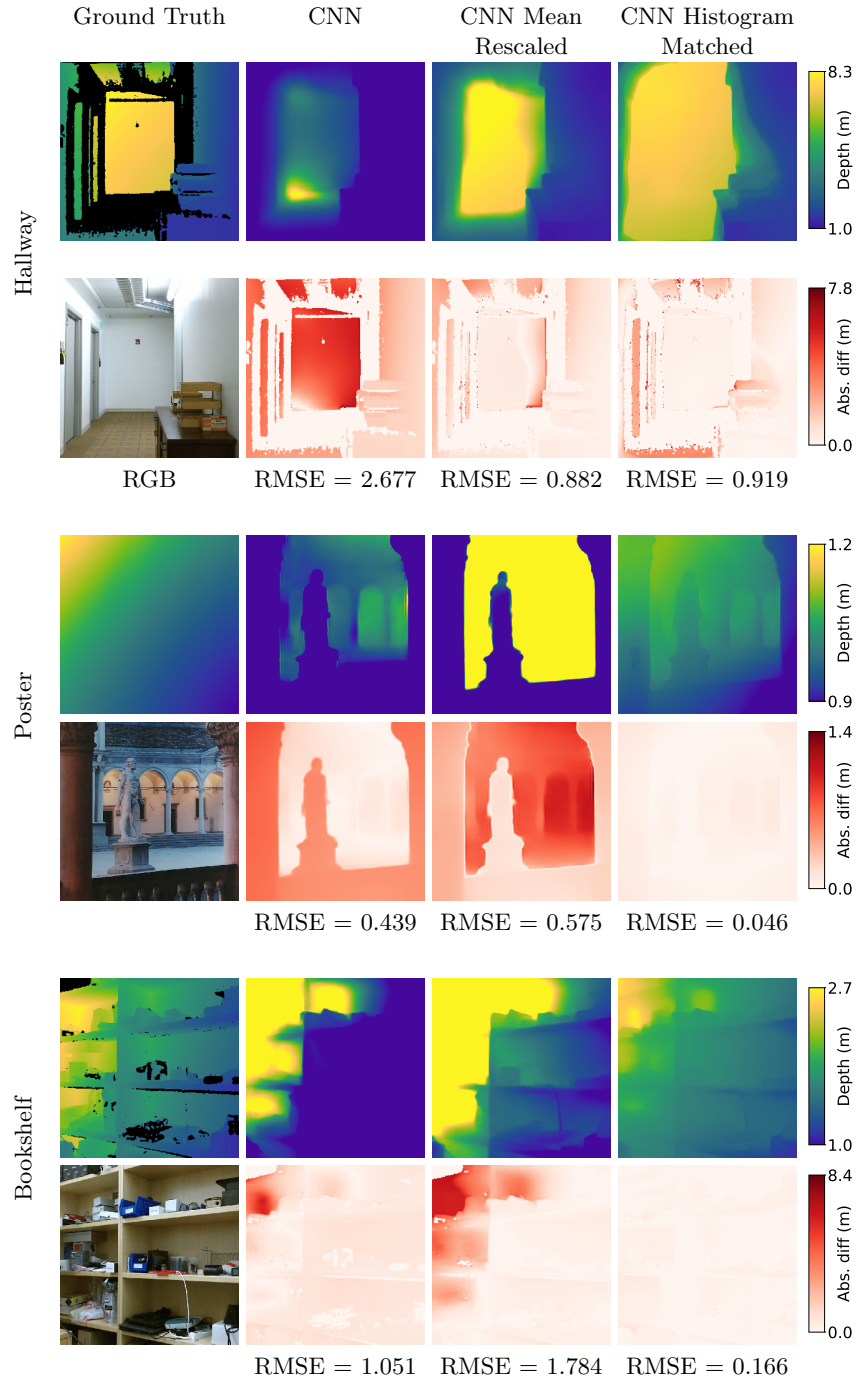

Fig. 17: Captured results initialized using the MiDaS CNN. Second row shows absolute difference between above estimates and ground truth. MiDaS does not output metric depth, so the CNN depth maps are scaled to be in the range (0.494, 9.094) by default. However, MiDaS does produce accurate ordinal depth, leading to stronger performance of our histogram matching compared to other methods.



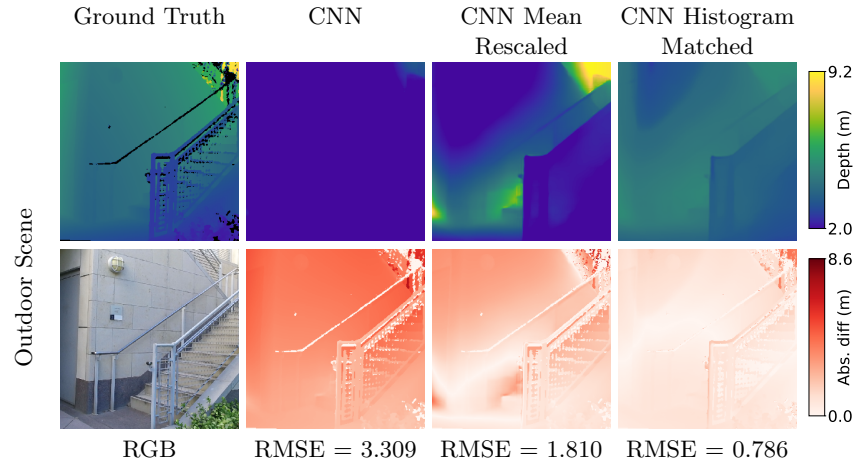

Fig. 18: Captured results initialized using the MiDaS CNN on an outdoor scene. Second row shows absolute difference between above estimates and ground truth. MiDaS does not output metric depth, so the CNN depth map is scaled to be in the range (0.494, 11.094) by default. However, MiDaS does produce accurate ordinal depth, leading to stronger performance of our histogram matching compared to other methods.

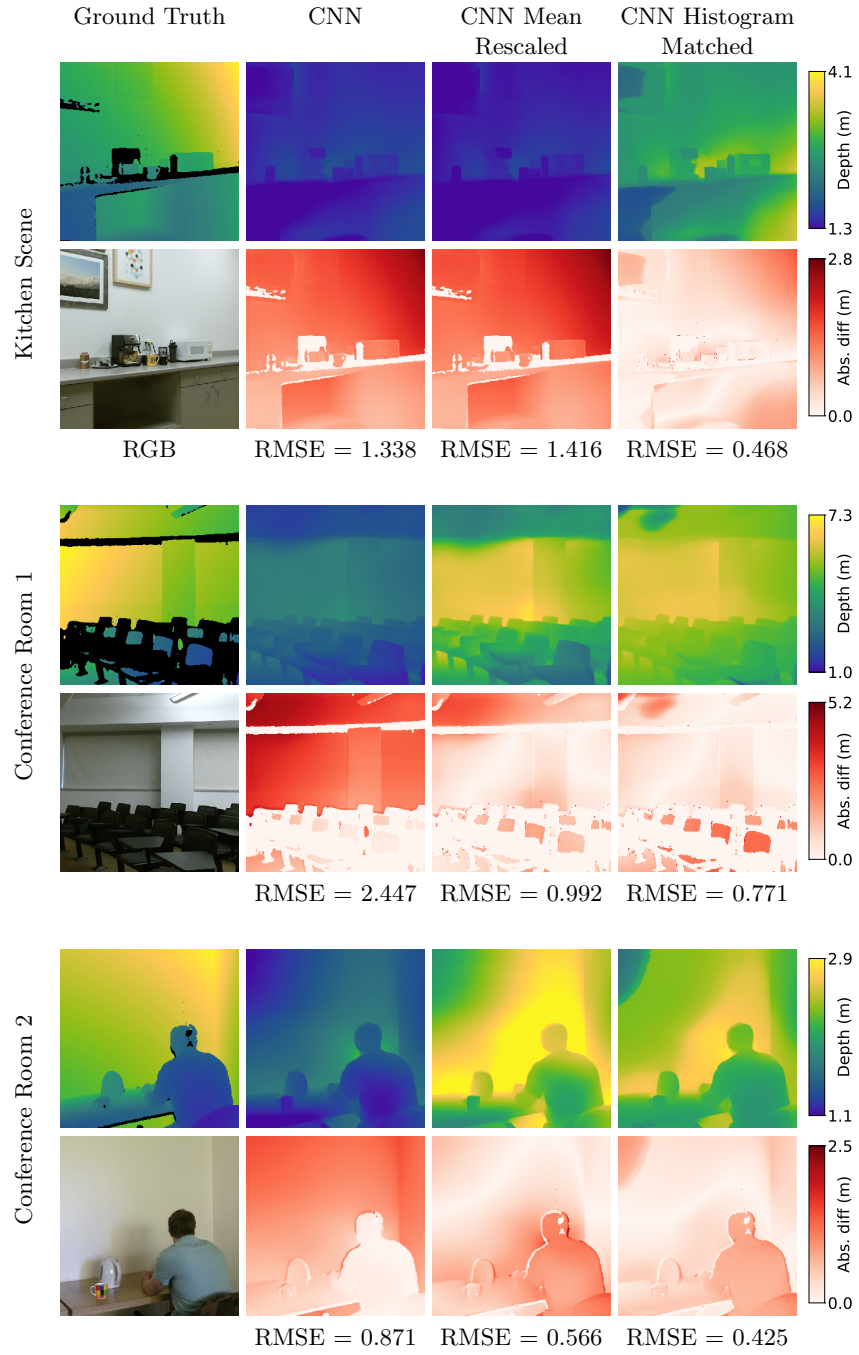

Fig. 19: Captured results initialized using the DenseDepth CNN. Second row shows absolute difference between above estimates and ground truth.

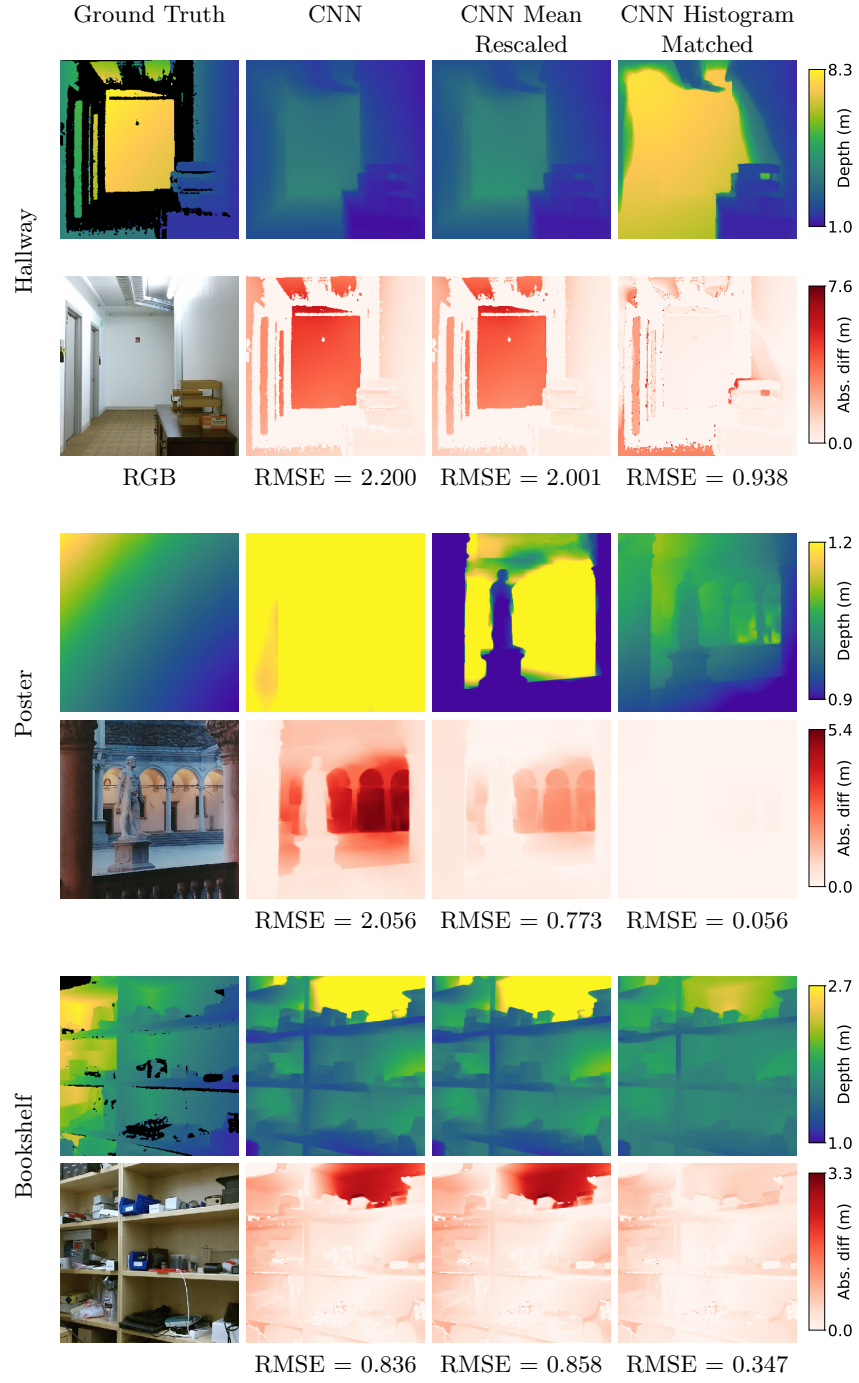

Fig. 20: Captured results initialized using the DenseDepth CNN. Second row shows absolute difference between above estimates and ground truth.

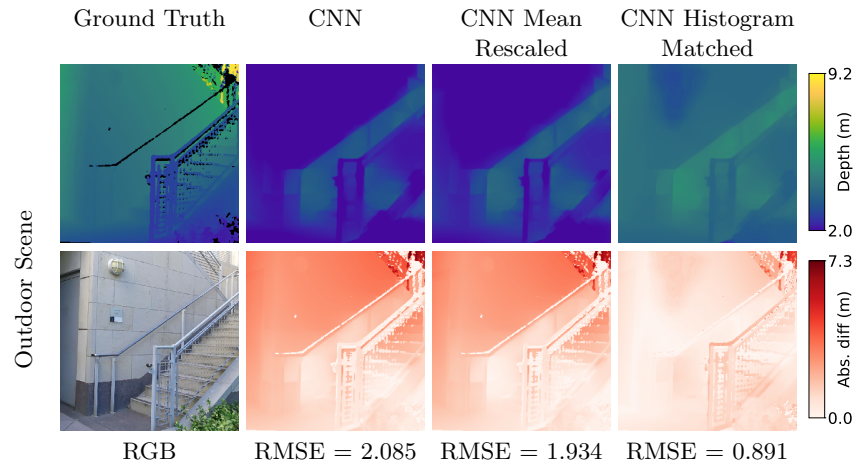

Fig. 21: Captured results initialized using the DenseDepth CNN on an outdoor scene. Second row shows absolute difference between above estimates and ground truth.

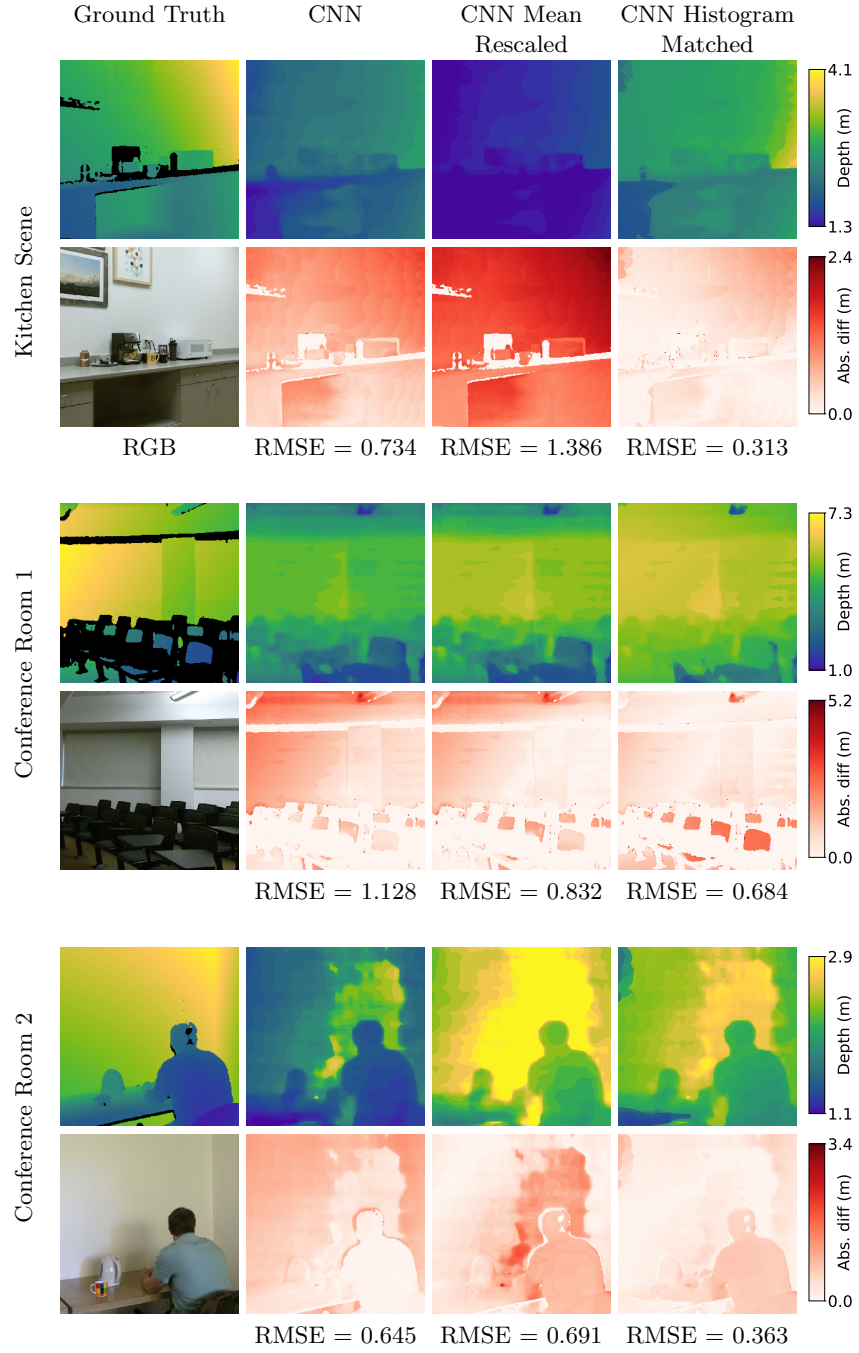

Fig. 22: Captured results initialized using the DORN CNN. Second row shows absolute difference between above estimates and ground truth.

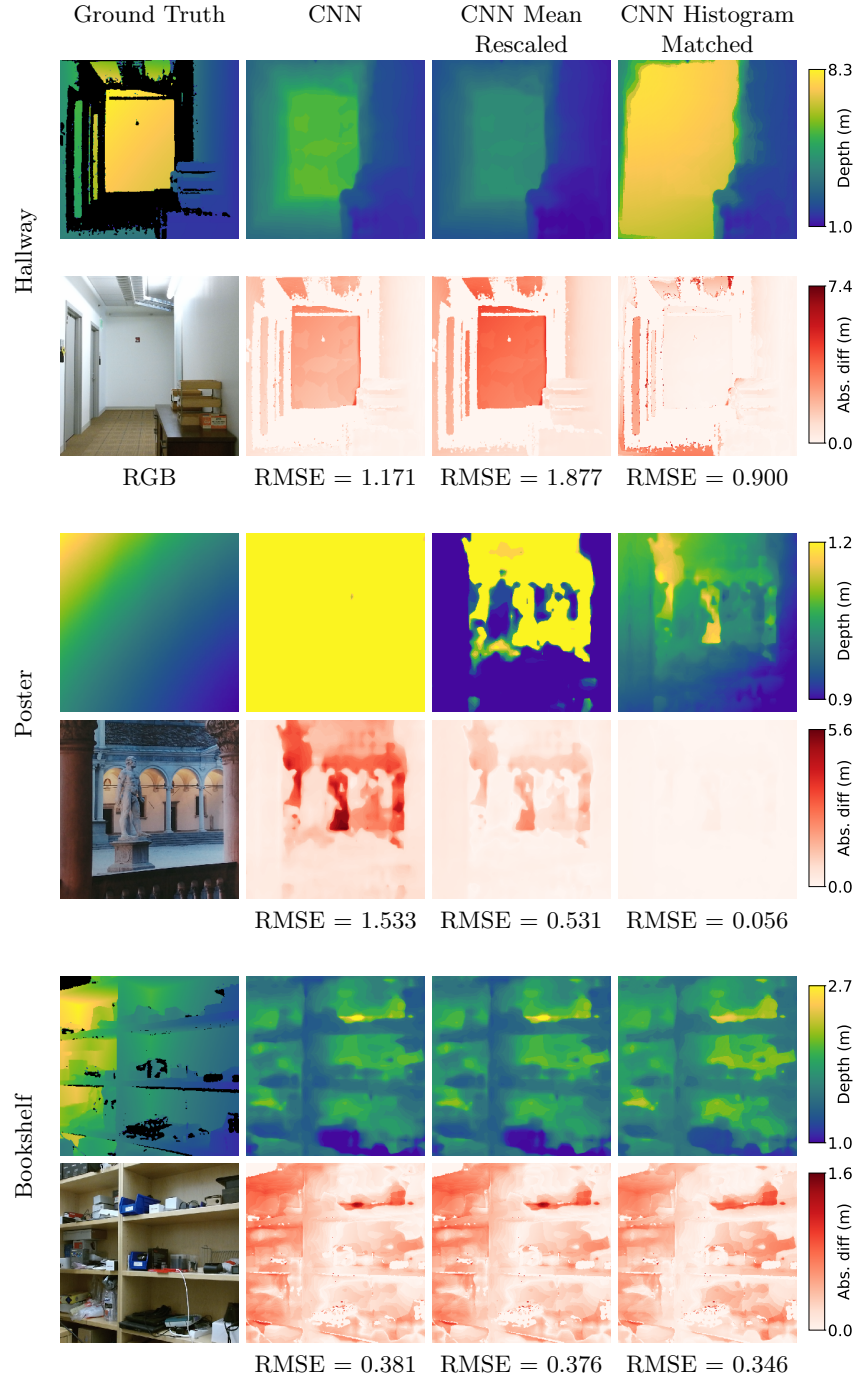

Fig. 23: Captured results initialized using the DORN CNN. Second row shows absolute difference between above estimates and ground truth.

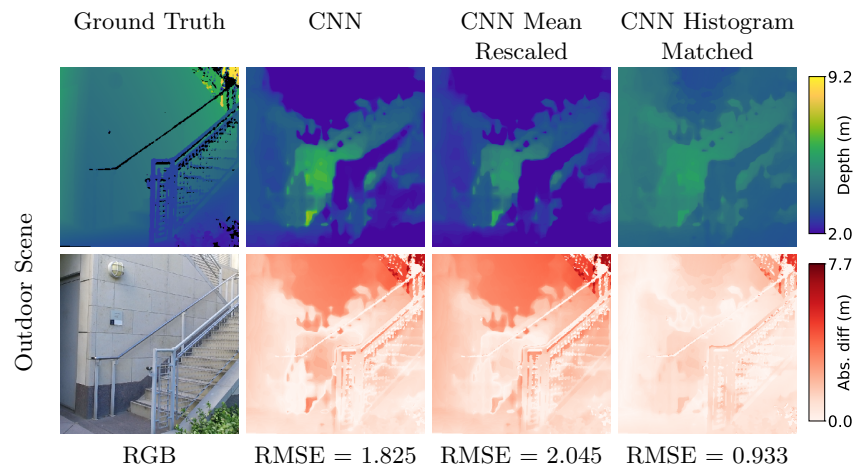

Fig. 24: Captured results initialized using the DORN CNN on an outdoor scene. Second row shows absolute difference between above estimates and ground truth.



## References

1. Alhashim, I., Wonka, P.: High quality monocular depth estimation via transfer learning. arXiv:1812.11941v2 (2018)
2. Fu, H., Gong, M., Wang, C., Batmanghelich, K., Tao, D.: Deep ordinal regression network for monocular depth estimation. In: Proc. CVPR (2018)
3. Lasinger, K., Ranftl, R., Schindler, K., Koltun, V.: Towards robust monocular depth estimation: Mixing datasets for zero-shot cross-dataset transfer. arXiv:1907.01341 (2019)
4. McManamon, P.: Review of ladar: a historic, yet emerging, sensor technology with rich phenomenology. *Optical Engineering* **51**(6), 060901 (2012)
5. O'Connor, D.V., Phillips, D.: Time-correlated single photon counting. Academic Press (1984)
